# Supplementary material for: Examining the Intersection between Gender, Community Health Workers, and Vector Control Policies: A Text Mining Literature Review
Source: PubMed Central journal article supplement (PMC8922516; doi:10.4269/ajtmh.21-0619), 2022-01-24
Supplement: tpmd210619.SD1.pdf [file tpmd210619.SD1.pdf]

# Examining the intersection between gender, community health workers and vector control policies: a text mining literature review

Ana De Menezes<sup>1</sup>, Ana Carolina Nunes<sup>2</sup>, Denise Nacif Pimenta<sup>3</sup>, Gabriela Lotta<sup>2</sup>, Theresia E. Nkya<sup>5</sup>, Morgana G. Martins Krieger<sup>2</sup>, Brunah Schall<sup>3</sup>, Clare Wenham<sup>8\*</sup>

## Supplementary information

### Search Strings

| Examining the intersection between gender, community health workers and vector control policies: a text mining literature review |                   |                         |        |                                                                                                                                                                                                                                                                      |                                                                                                                                                                                                    |                |
|----------------------------------------------------------------------------------------------------------------------------------|-------------------|-------------------------|--------|----------------------------------------------------------------------------------------------------------------------------------------------------------------------------------------------------------------------------------------------------------------------|----------------------------------------------------------------------------------------------------------------------------------------------------------------------------------------------------|----------------|
| Search Strings                                                                                                                   |                   |                         |        |                                                                                                                                                                                                                                                                      |                                                                                                                                                                                                    |                |
| Database                                                                                                                         | Database category | String category         | Amount | Type of documents (non-exclusive)                                                                                                                                                                                                                                    | String details                                                                                                                                                                                     | library        |
| Web of Science                                                                                                                   | All databases     | Gender & vector control | 2,068  | ARTICLE (1,984); OTHER (928); REVIEW (256); ABSTRACT (110); MEETING (99); CLINICAL TRIAL (96); UNSPECIFIED (49); REPORT (44); EDITORIAL (38); LETTER (17); BOOK (10); EARLY ACCESS (7); NEWS (5); REFERENCE MATERIAL (4); CORRECTION (4); BIOGRAPHY (1); PATENT (1); | TS = ((gender* OR wom*) AND (((vector OR dengue OR zika OR mosquito OR malaria OR aedes OR arbovir* OR chikungunya) NEAR/2 (control OR management OR program* OR strateg*))) OR "vector control")) | Endnote online |

|                |               |                                           |      |                                                                                                                                                                                                                                                                 |                                                                                                                                                                                                                                                                                                                                                                                              |                |
|----------------|---------------|-------------------------------------------|------|-----------------------------------------------------------------------------------------------------------------------------------------------------------------------------------------------------------------------------------------------------------------|----------------------------------------------------------------------------------------------------------------------------------------------------------------------------------------------------------------------------------------------------------------------------------------------------------------------------------------------------------------------------------------------|----------------|
|                |               |                                           |      | CASE REPORT (1)                                                                                                                                                                                                                                                 |                                                                                                                                                                                                                                                                                                                                                                                              |                |
| Web of Science | All databases | Vector control & community health workers | 373  | ARTICLE (354); OTHER (199); CLINICAL TRIAL (35); REVIEW (26); ABSTRACT (20); MEETING (18); UNSPECIFIED (8); EDITORIAL (4); BOOK (4); LETTER (2)                                                                                                                 | TS = (((vector OR dengue OR zika OR mosquito OR <i>malaria</i> OR <i>aedes</i> OR <i>arbovir*</i> OR <i>chikungunya</i> ) NEAR/2 (control OR management OR program* OR strateg*)) OR "vector control") AND ("community health worker*" OR "community worker*" OR "community health practitioner*" OR (" <i>community health</i> " NEAR/2 <i>worker</i> ) OR " <i>vector control agent</i> ") | Endnote online |
| Web of Science | All databases | Community health worker & gender          | 2411 | ARTICLE (2,354); OTHER (1,169); CLINICAL TRIAL (290); REVIEW (156); ABSTRACT (67); MEETING (51); UNSPECIFIED (47); EDITORIAL (24); EARLY ACCESS (20); CASE REPORT (12); LETTER (7); BOOK (3); NEWS (2); BIOGRAPHY (1); LEGISLATION (1); REFERENCE MATERIAL (1); | TS = ((gender* OR wom*) AND ("community health worker*" OR "community worker*" OR "community health practitioner*" OR ("community health" NEAR/2 worker) OR "vector control agent"))                                                                                                                                                                                                         | Endnote online |

|                |               |                                                  |     |                                                                                                                                          |                                                                                                                                                                                                                                                                                                                                             |                |
|----------------|---------------|--------------------------------------------------|-----|------------------------------------------------------------------------------------------------------------------------------------------|---------------------------------------------------------------------------------------------------------------------------------------------------------------------------------------------------------------------------------------------------------------------------------------------------------------------------------------------|----------------|
|                |               |                                                  |     | BIBLIOGRAPHY (1); REPORT (1)                                                                                                             |                                                                                                                                                                                                                                                                                                                                             |                |
| Web of Science | All databases | COVID & gender & vector control                  | 8   | ARTICLE (7); OTHER (2); BOOK (1); CASE REPORT (1); REVIEW (1)                                                                            | TS = (((COVID* OR corona*) AND (gender* OR wom*) AND (((vector OR dengue OR zika OR mosquito OR malaria OR aedes OR arbovir* OR chikungunya) NEAR/2 (control OR management OR program* OR strateg*)) OR "vector control"))))                                                                                                                | Endnote online |
| Web of Science | All databases | COVID & gender & community health workers        | 17  | ARTICLE (17); OTHER (10); REVIEW (3); CLINICAL TRIAL (2); EARLY ACCESS (1); UNSPECIFIED (1)                                              | TS = ((COVID* OR corona*) AND (gender* OR wom*) AND ("community health worker*" OR "community health practitioner*" OR ("community health" NEAR/2 worker) OR "vector control agent"))                                                                                                                                                       | Endnote online |
| Web of Science | All databases | COVID & community health worker & vector control | 0   | 0                                                                                                                                        | TS = (((COVID* OR corona*) AND (((vector OR dengue OR zika OR mosquito OR malaria OR aedes OR arbovir* OR chikungunya) NEAR/2 (control OR management OR program* OR strateg*)) OR "vector control") AND ("community health worker*" OR "community health practitioner*" OR ("community health" NEAR/2 worker) OR "vector control agent")))) | Endnote online |
|                |               |                                                  |     |                                                                                                                                          |                                                                                                                                                                                                                                                                                                                                             |                |
| Scopus         | All databases | Gender & vector control                          | 361 | Article (276); Review (52); Book Chapter (7); Note (7); Conference Paper (6); Editorial (6); Letter (5); Short Survey (1); Undefined (1) | TITLE-ABS-KEY(((gender* OR wom*) AND (((vector OR dengue OR zika OR mosquito OR malaria OR aedes OR arbovir* OR chikungunya) NEAR/2 (control OR management OR program* OR strateg*)) OR "vector control"))                                                                                                                                  | Endnote online |
| Scopus         | All databases | Vector control & community health workers        | 84  | Article (73); Review (8); Book Chapter (2); Conference                                                                                   | TITLE-ABS-KEY((((vector OR dengue OR zika OR mosquito OR malaria OR aedes OR arbovir* OR chikungunya) NEAR/2 (control OR management OR program* OR strateg*)) OR "vector control"))                                                                                                                                                         | Endnote online |

|        |               |                                                  |       |                                                                                                                                                                                        |                                                                                                                                                                                                                                                                                                                                                  |                |
|--------|---------------|--------------------------------------------------|-------|----------------------------------------------------------------------------------------------------------------------------------------------------------------------------------------|--------------------------------------------------------------------------------------------------------------------------------------------------------------------------------------------------------------------------------------------------------------------------------------------------------------------------------------------------|----------------|
|        |               |                                                  |       | Paper (1)                                                                                                                                                                              | AND (“community health worker*” OR “community worker*” OR “community health practitioner*” OR (“community health” NEAR/2 worker) OR “vector control agent”))                                                                                                                                                                                     |                |
| Scopus | All databases | Community health worker & gender                 | 1,628 | Article (1,480);<br>Review (92);<br>Conference Paper (20);<br>Book Chapter (10); Note (8);<br>Book (4);<br>Letter (4);<br>Short Survey (4);<br>Conference Review (3);<br>Editorial (3) | TITLE-ABS-KEY((gender* OR wom*) AND (“community health worker*” OR “community health practitioner*” OR (“community health” NEAR/2 worker) OR “vector control agent”))                                                                                                                                                                            | Endnote online |
| Scopus | All databases | COVID & gender & vector control                  | 1     | Short Survey (1)                                                                                                                                                                       | TITLE-ABS-KEY((((COVID* OR corona*) AND (gender* OR wom*)AND (((vector OR dengue OR zika OR mosquito OR malaria OR aedes OR arbovir* OR chikungunya) NEAR/2 (control OR management OR program* OR strateg*)) OR "vector control"))))                                                                                                             | Endnote online |
| Scopus | All databases | COVID & gender & community health workers        | 8     | Article (5);<br>Review (2);<br>Short Survey (1)                                                                                                                                        | TITLE-ABS-KEY(((COVID* OR corona*) AND (gender* OR wom*) AND (“community health worker*” OR “community worker*” OR “community health practitioner*” OR (“community health” NEAR/2 worker) OR “vector control agent”))                                                                                                                            | Endnote online |
| Scopus | All databases | COVID & community health worker & vector control | 0     |                                                                                                                                                                                        | TITLE-ABS-KEY((((COVID* OR corona*) AND (((vector OR dengue OR zika OR mosquito OR malaria OR aedes OR arbovir* OR chikungunya) NEAR/2 (control OR management OR program* OR strateg*)) OR "vector control") AND (“community health worker*” OR “community worker*” OR “community health practitioner*” OR (“community health” NEAR/2 worker) OR | Endnote online |

|        |               |                                           |     |  | "vector control agent"))                                                                                                                                                                                                                                                                                                                         |     |
|--------|---------------|-------------------------------------------|-----|--|--------------------------------------------------------------------------------------------------------------------------------------------------------------------------------------------------------------------------------------------------------------------------------------------------------------------------------------------------|-----|
| PUBMED | All databases | Gender & vector control                   | 83  |  | TITLE/ABSTRACT((gender* OR wom*) AND (((vector OR dengue OR zika OR mosquito OR malaria OR aedes OR arbovir* OR chikungunya) NEAR/2 (control OR management OR program* OR strateg*)) OR "vector control"))                                                                                                                                       | csv |
| PUBMED | All databases | Vector control & community health workers | 56  |  | TITLE/ABSTRACT((((vector OR dengue OR zika OR mosquito OR malaria OR aedes OR arbovir* OR chikungunya) NEAR/2 (control OR management OR program* OR strateg*)) OR "vector control") AND ("community health worker*" OR "community worker*" OR "community health practitioner*" OR ("community health" NEAR/2 worker) OR "vector control agent")) | csv |
| PUBMED | All databases | Community health worker & gender          | 269 |  | TITLE/ABSTRACT((gender* OR wom*) AND ("community health worker*" OR "community worker*" OR "community health practitioner*" OR ("community health" NEAR/2 worker) OR "vector control agent"))                                                                                                                                                    | csv |
| PUBMED | All databases | COVID & gender & vector control           | 0   |  | TITLE/ABSTRACT(((COVID* OR corona*) AND (gender* OR wom*))AND (((vector OR dengue OR zika OR mosquito OR malaria OR aedes OR arbovir* OR chikungunya) NEAR/2 (control OR management OR program* OR strateg*)) OR "vector control"))                                                                                                              | csv |
| PUBMED | All databases | COVID & gender & community health workers | 0   |  | TITLE/ABSTRACT(((COVID* OR corona*) AND (gender* OR wom*)) AND ("community health worker*" OR "community worker*" OR "community health practitioner*" OR ("community health" NEAR/2 worker) OR "vector control agent"))                                                                                                                          | csv |
| PUBMED | All           | COVID &                                   | 0   |  | TITLE/ABSTRACT(((COVID* OR corona*) AND (((vector OR                                                                                                                                                                                                                                                                                             | csv |

|   |               |                                                       |  |  |                                                                                                                                                                                                                                                                                                                                                       |  |
|---|---------------|-------------------------------------------------------|--|--|-------------------------------------------------------------------------------------------------------------------------------------------------------------------------------------------------------------------------------------------------------------------------------------------------------------------------------------------------------|--|
| D | database<br>s | communit<br>y health<br>worker &<br>vector<br>control |  |  | dengue OR zika OR mosquito<br>OR malaria OR aedes OR<br>arbovir* OR<br>chikungunya) NEAR/2 (control<br>OR management OR program*<br>OR strateg*)) OR "vector<br>control") AND ("community<br>health worker*" OR "community<br>worker*" OR "community health<br>practitioner*" OR ("community<br>health" NEAR/2 worker) OR<br>"vector control agent")) |  |
|---|---------------|-------------------------------------------------------|--|--|-------------------------------------------------------------------------------------------------------------------------------------------------------------------------------------------------------------------------------------------------------------------------------------------------------------------------------------------------------|--|
